# Supplementary material for: Strongly bent nickel imides supported by a chelating bis(N-heterocyclic carbene) ligand
Source: Royal Society of Chemistry journal article supplement (doi:10.1039/c3sc51517f), 2013-01-01

## Supporting Information for:

### A Strongly Bent Nickel Imide Supported By a New Chelating Bis(*N*-Heterocyclic Carbene) Ligand

Nicole D. Harrold and Gregory L. Hillhouse\*

*Gordon Center for Integrative Science, Department of Chemistry,  
The University of Chicago, Chicago, Illinois 60637*

\*To whom correspondence should be addressed. E-mail: g-hillhouse@uchicago.edu

|                                                                                                                                             |              |
|---------------------------------------------------------------------------------------------------------------------------------------------|--------------|
| <b>1. Experimental Section</b>                                                                                                              | <b>SI-2</b>  |
| Synthesis of 1- <i>tert</i> -butyl-4,5-dimethyl-1 <i>H</i> -imidazole-3-oxide ( <b>1</b> )                                                  | SI-2         |
| Synthesis of 1- <i>tert</i> -butyl-4,5-dimethyl-1 <i>H</i> -imidazole ( <b>2</b> )                                                          | SI-2         |
| Synthesis of 3,3'-methylenebis(1- <i>tert</i> -butyl-4,5-dimethyl-1 <i>H</i> -imidazol-3-ium dibromide ( <b>3</b> )                         | SI-3         |
| Synthesis of 3,3'-methylenebis(1- <i>tert</i> -butyl-4,5-dimethylimidazoliylidene ( <b>4</b> )                                              | SI-3         |
| Synthesis of (TMTBM)Ni( $\eta^2$ -cod) ( <b>5</b> )                                                                                         | SI-4         |
| Synthesis of (TMTBM)Ni( $\eta^2$ -N <sub>3</sub> Ar) (Ar = 1,3-diisopropylphenyl) ( <b>6</b> )                                              | SI-4         |
| Synthesis of (TMTBM)Ni=N(dmp) (dmp = 2,6-dimesitylphenyl) ( <b>7a</b> )                                                                     | SI-5         |
| Synthesis of (TMTBM)Ni=N(dipp) (dipp = 2,6-[(2,6-diisopropyl)phenyl]phenyl) ( <b>7b</b> )                                                   | SI-5         |
| Synthesis of [(TMTBM)Ni=N(dipp)] <sub>2</sub> [B(C <sub>6</sub> F <sub>5</sub> ) <sub>4</sub> ] <sub>2</sub> ( <b>9</b> )                   | SI-6         |
| <b>2. DFT calculations</b>                                                                                                                  | <b>SI-7</b>  |
| Table 1. Select metrical data for (TMTBM)Ni=N(dmp) (DFT & structure)                                                                        | SI-7         |
| Table 2. Optimized geometry for (TMTBM)Ni=N(dmp)                                                                                            | SI-7         |
| Table 3. Optimized geometry for (TMTBM)Ni=N(dipp)+                                                                                          | SI-9         |
| <b>3. Crystallographic Experimental Section and Tables</b>                                                                                  | <b>SI-11</b> |
| Table 4. Crystal data for (TMTBM)Ni( $\eta^2$ -cod) ( <b>5</b> )                                                                            | SI-13        |
| Figure 1. Fully labeled ORTEP for (TMTBM)Ni( $\eta^2$ -cod) ( <b>5</b> )                                                                    | SI-14        |
| Table 5. Crystal data for (TMTBM)Ni( $\eta^2$ -N <sub>3</sub> Ar) ( <b>6</b> )                                                              | SI-15        |
| Figure 2. Fully labeled ORTEP for (TMTBM)Ni( $\eta^2$ -N <sub>3</sub> Ar) ( <b>6</b> )                                                      | SI-16        |
| Table 6. Crystal data for (TMTBM)Ni=N(dmp) ( <b>7a</b> )                                                                                    | SI-17        |
| Figure 3. Fully labeled ORTEP for (TMTBM)Ni=N(dmp) ( <b>7a</b> )                                                                            | SI-18        |
| Table 7. Crystal structure for (TMTBM)Ni=N(dipp) ( <b>7b</b> )                                                                              | SI-19        |
| Figure 4. Fully labeled ORTEP for (TMTBM)Ni=N(dipp) ( <b>7b</b> )                                                                           | SI-20        |
| Table 8. Crystal structure for [(TMTBM)Ni=N(dipp)] <sub>2</sub> [B(C <sub>6</sub> F <sub>5</sub> ) <sub>4</sub> ] <sub>2</sub> ( <b>9</b> ) | SI-21        |
| Figure 5. Fully labeled ORTEP for [(TMTBM)Ni=N(dipp)] <sub>2</sub> [B(C <sub>6</sub> F <sub>5</sub> ) <sub>4</sub> ] <sub>2</sub>           | SI-22        |
| <b>4. References</b>                                                                                                                        | <b>SI-20</b> |
| <b>5. NMR Spectra Scans</b>                                                                                                                 | <b>SI-21</b> |

## 1. Experimental Section

**General Considerations.** Unless stated otherwise, all operations were performed in an MBraun *Lab Master* dry box under an atmosphere of purified nitrogen. Anhydrous diethyl ether and tetrahydrofuran were purchased from Fischer, stirred over sodium metal, and filtered through activated alumina.<sup>1</sup> Pentane was purchased from Sigma Aldrich and dried by passage through activated alumina and Q-5 columns. C<sub>6</sub>D<sub>6</sub> was purchased from Cambridge Isotope Laboratories, degassed by freeze-pump-thaw cycles, and dried over CaH<sub>2</sub> or activated 4 Å molecular sieves. Celite, alumina, and 4 Å molecular sieves were activated by evacuation overnight at 180°C. N<sub>3</sub>(dmp) (dmp = 2,6-dimesitylphenyl, N<sub>3</sub>dipp (dipp = 2,6-bis(2,6-diisopropylphenyl)phenyl), N<sub>3</sub>Ar (Ar = 2,6-di-*iso*-propylphenyl) were prepared according to the literature.<sup>2,3</sup> All other chemicals were used as received. Elemental analyses were performed by Midwest Microlab (Indianapolis, IN). <sup>1</sup>H NMR spectra were recorded on a Bruker 400 MHz NMR spectrometer and reported with reference to solvent resonance (for example, residual C<sub>6</sub>D<sub>5</sub>H in C<sub>6</sub>D<sub>6</sub> at 7.16 ppm). X-ray diffraction data were collected on a Siemens Platform goniometer with a Charged Coupled Device (CCD) detector. Structures were solved by direct or Patterson methods using the SHELXTL (version 5.1) program library (G. Sheldrick, Bruker Analytical X-ray Systems, Madison, WI).<sup>4</sup>

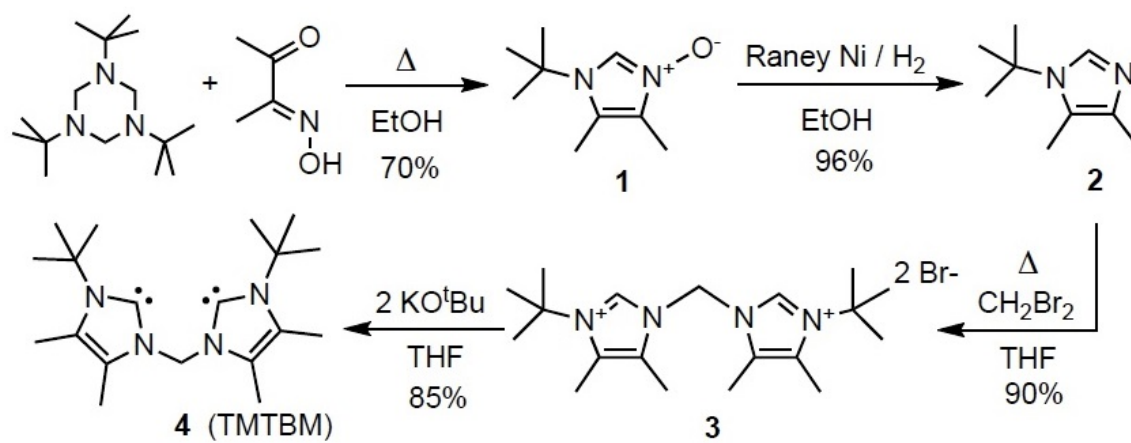

**Synthesis of 1-*tert*-butyl-4,5-dimethyl-1*H*-imidazole-3-oxide (1).** A solution of 2,3-butanedione monoxime (47.9 g, 0.474 mol) and 1,3,5-tri-*tert*-butyl-hexahydro-[1,3,5]triazine (40.33 g, 0.158 mol) in EtOH (200 mL) was heated at reflux for 12 h. Evaporation of the solvent under reduced pressure yielded a red oil, which was washed twice with Et<sub>2</sub>O (2 x 200 mL). The viscous oily crude product **1** was used in the next step without further purification. Yield: 79.59 g (70%). Dark red oil. IR (CaF<sub>2</sub>, fluorolube):  $\nu$  (cm<sup>-1</sup>) 3358, 3139, 2958, 2931, 2873, 1626, 1450 (br), 1396, 1381, 1339, 1255, 1194, 1150, 1080. <sup>1</sup>H NMR (22°C, 400 MHz, CDCl<sub>3</sub>):  $\delta$  7.87 (s, 1H, *HC*), 2.25 (s, 3H, CCH<sub>3</sub>), 2.08 (s, 3H, CCH<sub>3</sub>), 1.52 (s, 9H, C(CH<sub>3</sub>)<sub>3</sub>). <sup>13</sup>C{<sup>1</sup>H} NMR (22°C, 125.75 MHz, CDCl<sub>3</sub>):  $\delta$  127.89, 122.94, 120.86, 57.87, 29.78, 11.95, 6.98. GC-MS (m/z): 168 (M<sup>+</sup>), 112, 97, 42.

**Synthesis of 1-*tert*-butyl-4,5-dimethyl-1*H*-imidazole (2).** To a stirring solution of the imidazole N-oxide **1** (55.71 g, 0.332 mol) in EtOH (500 mL), a water suspension of Raney-nickel was added in small portions (~20 g Ni total). The reaction was stirred at room temperature under an atmosphere of hydrogen gas until gas consumption ceased. After reduction of **2** was completed, the solution was filtered through Celite and the filtrate was reduced to dryness under reduced pressure. The product was extracted with Et<sub>2</sub>O (3 x 100 mL) and reduced to dryness. Pure **2** was obtained after distillation of the product resulting in a pale yellow oil (48.46 g, 96%) \*\*\*NOTE: it is very important to extract **2** from precursor **1** before distillation. N-oxides are known to be violently explosive under standard distillation conditions.<sup>5</sup> IR (CaF<sub>2</sub>, fluorolube):  $\nu$  (cm<sup>-1</sup>) 2959, 2932, 2873, 1500, 1451, 1388, 1366, 1202. <sup>1</sup>H NMR (22°C, 400 MHz, CDCl<sub>3</sub>):  $\delta$  7.432 (s, 1H, *HC*(2)), 2.260 (s, 3H, CCH<sub>3</sub>), 2.094 (s, 3H, CCH<sub>3</sub>), 1.539 (s, 9H, C(CH<sub>3</sub>)<sub>3</sub>). <sup>13</sup>C{<sup>1</sup>H} NMR (22°C, 125.75 MHz, CDCl<sub>3</sub>):  $\delta$  138.84, 132.63, 122.66, 55.61, 30.10, 12.70, 11.92. GC-MS (m/z): 152 (M<sup>+</sup>)

**Synthesis of 3,3'-methylenebis(1-*tert*-butyl-4,5-dimethyl-1*H*-imidazol-3-ium dibromide (3).** Dibromomethane (41.50 g, 0.239 mol) was added to a stirring solution of **2** (48.46 g, 0.318 mol) in 100 mL of benzene. The solution was refluxed for 2 days after which the solvent was removed under reduced pressure. Acetone (200 mL) was added to the flask and the resulting white suspension was allowed to stir at room temperature for 1 hour. The white solids were filtered and dried under reduced pressure for 2 hours.

Yield: 68.5 g (90%). IR (CaF<sub>2</sub>, fluorolube):  $\nu$  (cm<sup>-1</sup>) 3026, 2919, 2308, 1782, 1720, 1620, 1541, 1458. <sup>1</sup>H NMR (22°C, 400 MHz, CDCl<sub>3</sub>):  $\delta$  10.632 (s, 2H, NCHN) 7.532 (s, 2H, NCH<sub>2</sub>N), 2.438 (s, 6H, CCH<sub>3</sub>), 2.389 (s, 6H, CCH<sub>3</sub>), 1.6912 (s, 18H, C(CH<sub>3</sub>)<sub>3</sub>); <sup>13</sup>C{<sup>1</sup>H} NMR (22°C, 125.75 MHz, CDCl<sub>3</sub>):  $\delta$  135.89, 129.50, 127.76, 62.44, 56.02, 29.63, 11.86, 9.81. Anal. Calcd. for C<sub>19</sub>H<sub>34</sub>N<sub>4</sub>Br<sub>2</sub>: C, 47.71; H, 7.16; N, 11.71. Found: C, 47.54; H, 6.94; N, 11.45.

**Synthesis of 1-*tert*-butyl-4,5-dimethyldimethylimidazoliylidene (4).** A suspension of **3** (8 g, 0.017 mol) was stirred in THF (100 mL) for 20 min after which time freshly sublimed KO<sup>t</sup>Bu (3.75 g, 0.033 mol) was added. After the solution was allowed to stir for 3 hours, the solvent was removed under reduced pressure. Pentane (100 mL) was added to the flask and the suspension was filtered through Celite. The filtrate was reduced to ½ volume and stored overnight at -35°C. The resulting white powder was filtered, washed with cold pentane, and dried under reduced pressure for 2 hours. Yield: 4.50 g (85%). IR (CaF<sub>2</sub>, fluorolube):  $\nu$  (cm<sup>-1</sup>) 2971, 2930, 2883, 1510, 1462, 1389. <sup>1</sup>H NMR (22°C, 400 MHz, C<sub>6</sub>D<sub>6</sub>):  $\delta$  6.197 (s, 2H, NCH<sub>2</sub>N), 2.414 (s, 6H, CCH<sub>3</sub>), 2.199 (s, 6H, CCH<sub>3</sub>), 1.527 (s, 18H, C(CH<sub>3</sub>)<sub>3</sub>). <sup>13</sup>C{<sup>1</sup>H} NMR (22°C, 125.75 MHz, CDCl<sub>3</sub>):  $\delta$  214.12, 126.07, 122.89, 63.20, 56.82, 31.71, 12.56, 10.23.

**Synthesis of (TMTBM)Ni( $\eta^2$ -cod) (5).** The ligand **4** (1.00 g, 3.160 mmol) was added to a stirring solution of Ni(cod)<sub>2</sub> (0.870 g, 3.160 mol) in THF (40 mL). The solution was stirred for 8 hours at room temperature and then reduced to dryness under vacuum. The resulting orange powder was washed with pentane (3 x 20 mL) and then dried under vacuum for 3 hours. Yield: 1.20 g (94%). IR (CaF<sub>2</sub>, fluorolube):  $\nu$  (cm<sup>-1</sup>) 3002, 2830, 2823, 1525, 1475, 1390; <sup>1</sup>H NMR (22°C, 400 MHz, C<sub>6</sub>D<sub>6</sub>):  $\delta$  6.106 (s, 2H, cod), 5.908 (d, 1H, NCH<sub>2</sub>N), 4.996 (d, 1H, NCH<sub>2</sub>N), 2.759 – 2.259 (m, 8H, cod), 2.201 – 2.168 (m, 2H, cod), 1.758 (s, 18H, C(CH<sub>3</sub>)<sub>3</sub>), 1.758 (s, 6H, CCH<sub>3</sub>), 1.535 (s, 6H, CCH<sub>3</sub>). <sup>13</sup>C{<sup>1</sup>H} NMR (22°C, 125.75 MHz, CDCl<sub>3</sub>):  $\delta$  203.50, 132.26, 122.15, 57.98, 55.88, 52.88, 35.85, 33.20, 32.16, 13.42, 8.36 (s, cod); Anal. Calcd. for C<sub>29</sub>H<sub>50</sub>N<sub>4</sub>Ni: C, 67.84; H, 9.82; N, 10.91. Found: C, 67.09; H, 9.29; N, 10.85.

**Synthesis of (TMTBM)Ni( $\eta^2$ -N<sub>3</sub>Ar) (6).** 2,6-di-iso-propylphenylazide (0.150 g, 0.740 mmol) was added to a cold (-35°C) stirring solution of **5** (0.300 g, 0.740 mmol) in

Et<sub>2</sub>O (15 mL). The resulting yellow suspension was stirred for 1 hour and then filtered. The resulting yellow powder was washed with pentane (2 x 10 mL) and then dried under vacuum for 3 hours. Yield: 0.427 g (94%). IR (CaF<sub>2</sub>, fluorolube):  $\nu$  (cm<sup>-1</sup>) 2725, 1641, 1485, 1419, 1402, 1376, 1327; <sup>1</sup>H NMR (22°C, 400 MHz, C<sub>6</sub>D<sub>6</sub>):  $\delta$  7.356 (d, 2H, *m*-C<sub>6</sub>H<sub>3</sub>), 7.084 (t, *p*-C<sub>6</sub>H<sub>3</sub>), 5.908 (d, 1H, NCH<sub>2</sub>N), 4.996 (d, H, NCH<sub>2</sub>N), 4.597 (sept, 1H, CH(CH<sub>3</sub>)<sub>2</sub>), 4.157 (sept, 1H, CH(CH<sub>3</sub>)<sub>2</sub>); 2.026 (s, 3H, CCH<sub>3</sub>), 1.821 (s, 3H, CCH<sub>3</sub>), 1.579 (s, 3H, CCH<sub>3</sub>), 1.456 (s, 3H, CCH<sub>3</sub>), 1.857 (s, 9H, C(CH<sub>3</sub>)<sub>3</sub>), 1.387 (s, 9H, C(CH<sub>3</sub>)<sub>3</sub>); 1.542 (d, 6H, CH(CH<sub>3</sub>)<sub>2</sub>), 1.387 (d, 6H, CH(CH<sub>3</sub>)<sub>2</sub>); <sup>13</sup>C{<sup>1</sup>H} NMR (22°C, 125.75 MHz, CDCl<sub>3</sub>):  $\delta$  190.01, 187.23, 161.09, 123.09, 115.98, 59.88, 58.98, 56.88, 55.23, 54.99, 32.18, 30.72, 31.08, 24.52, 22.10, 21.98, 28.79, 23.17. Anal. Calcd. for C<sub>31</sub>H<sub>49</sub>N<sub>7</sub>Ni: C, 64.37; H, 8.54; N, 16.95. Found: C, 64.23; H, 8.40; N, 16.73.

**Synthesis of (TMTBM)Ni=N(dmp) (7a).** 2,6-dimesitylphenylazide (0.263 g, 0.740 mmol) was added to a cold (-35 °C) stirring solution of **5** (0.300 g, 0.740 mmol) in Et<sub>2</sub>O (15 mL). Gas evolution was immediately observed, and the resulting red solution was stirred for 1 hour and then filtered and reduced to dryness. The resulting red powder was washed with pentane (2 x 10 mL) and then dried under vacuum for 3 hours. Yield: 520 mg (86%). IR (CaF<sub>2</sub>, fluorolube):  $\nu$  (cm<sup>-1</sup>) 3349, 3047, 1641, 1574, 1457, 1365, 1334, 1303, 1266, 1218; <sup>1</sup>H NMR (22°C, 400 MHz, C<sub>6</sub>D<sub>6</sub>):  $\delta$  6.704 (s, 4H, *H*-mesityl); 6.592 (d, 2H, *H*-phenyl) 6.574 (t, 1H, *H*-phenyl); 6.331 (d, 1H, NCH<sub>2</sub>N), 4.814 (d, 1H, 1 NCH<sub>2</sub>N); 2.614 (s, 12H, *o*-CH<sub>3</sub>); 2.165 (s, 6H, CCH<sub>3</sub>), 1.617 (1s, 6H, CCH<sub>3</sub>); 1.584 (s, 18H, C(CH<sub>3</sub>)<sub>3</sub>); 1.353 (s, 6H, *p*-CH<sub>3</sub>); <sup>13</sup>C{<sup>1</sup>H} NMR (22°C, 125.75 MHz, CDCl<sub>3</sub>):  $\delta$  183.12, 163.18, 143.36, 137.80, 133.25, 124.45, 124.24, 111.03, 87.76, 58.14, 55.51, 52.88, 32.80, 22.08, 21.92, 13.62, 8.68. Anal. Calcd. for C<sub>43</sub>H<sub>57</sub>N<sub>5</sub>Ni: C, 73.50; H, 8.18; N, 9.97. Found: C, 72.96; H, 8.08; N, 9.95.

**Synthesis of (TMTBM)Ni=N(dipp) (7b).** N<sub>3</sub>dipp (0.325 g, 0.740 mmol) was added to a cold (-35 °C) stirring solution of **5** (0.300 g, 0.740 mmol) in diethyl ether (15 mL). Gas evolution was immediately observed, and the resulting red solution was stirred for 1 hour and then filtered and reduced to dryness. The resulting red powder was washed with pentane (2 x 10 mL) and then dried under vacuum for 3 hours. Yield: 518 mg (89 %). Crystals suitable for X-ray diffraction were grown from a concentrated diethyl ether solution at -35 °C; IR (CaF<sub>2</sub>, Fluorolube):  $\nu$  (cm<sup>-1</sup>) 3035 (s), 1637 (m), 1572

(m), 1450 (w), 1368 (w), 1334 (w), 1266 (w), 1217 (w);  $^1\text{H}$  NMR (22°C, 400 MHz,  $\text{C}_6\text{D}_6$ ):  $\delta$  7.24 (d, 4H,  $\text{C}_6\text{H}_3$ ), 7.15 (t, 2H,  $\text{C}_6\text{H}_3$ ), 6.85 (d, 2H,  $\text{C}_6\text{H}_3$ ), 6.70 (t, 1H,  $\text{C}_6\text{H}_3$ ), 3.76 (m, 4H,  $\text{CH}(\text{CH}_3)_2$ ), 1.64 (s, 6H,  $\text{CH}_3$ ), 1.54 (s, 6H,  $\text{CH}_3$ ), 1.54 (s, 18H,  $^t\text{Bu}$ ), 1.45 (d, 12H,  $\text{CH}(\text{CH}_3)_2$ ), 1.25 (d, 12H,  $\text{CH}(\text{CH}_3)_2$ );  $^{13}\text{C}\{^1\text{H}\}$  NMR (22°C, 125.75 MHz,  $\text{CDCl}_3$ ):  $\delta$  182.5, 148.8, 144.7, 130.2, 126.8, 124.8, 124.4, 122.6, 58.0, 55.6, 32.9, 31.2, 26.1, 24.7, 13.6, 8.8.

**Synthesis of [(TMTBM)Ni=N(dipp)]<sub>2</sub>[B(C<sub>6</sub>F<sub>5</sub>)<sub>4</sub>]<sub>2</sub> (9).** In a scintillation vial, **7b** (100 mg, 0.125 mmol) was dissolved in 10 mL thf and cooled to -45 °C. Subsequently, 108 mg [FeCp<sub>2</sub>][B(C<sub>6</sub>F<sub>5</sub>)<sub>4</sub>], was added via spatula and the solution was stirred for 2 hours. The deep purple solution was filtered through Celite and reduced to dryness. The powder was washed with *n*-pentane (3 x 10 mL) and then dried under vacuum for 3 hours. Yield: 163 mg (89 %). Crystals suitable for X-ray diffraction were grown from a concentrated thf solution at -35 °C. Anal. Calcd. for C<sub>146</sub>H<sub>136</sub>N<sub>10</sub>Ni<sub>2</sub>B<sub>2</sub>F<sub>20</sub>: C, 59.86; H, 4.68; N, 4.78. Found: C, 62.21; H, 4.81; N, 4.64. \*\*Complex **9** is not sufficiently thermally stable to give accurate elemental analyses. IR (CaF<sub>2</sub>, Fluorolube):  $\nu$  1359(m), 1242 (m), 1210 (w), 1170 (s), 1095 (s), 940 (w), 849 (w), 680 (s), 659 (m), 592 (s), 455 (m) cm<sup>-1</sup>.  $^1\text{H}$  NMR (22°C, 400 MHz, thf-d<sub>8</sub>):  $\delta$  7.844 (d, 2H, NCH<sub>2</sub>N), 7.19 (t, 4H, C<sub>6</sub>H<sub>4</sub>), 7.15 (s, 4H, C<sub>6</sub>H<sub>2</sub>), 6.94 (d, 8H, C<sub>6</sub>H<sub>4</sub>), 6.28 (d, 2H, NCH<sub>2</sub>N), 2.83-2.93 (m, 8H, CH(CH<sub>3</sub>)<sub>2</sub>), 2.29 (s, 12H, CCH<sub>3</sub>), 2.24 (s, 12H, CCH<sub>3</sub>), 2.01 (s, 36H,  $^t\text{Bu}$ ), 1.15 – 1.10 (d, 48H, CH(CH<sub>3</sub>)<sub>2</sub>).  $^{13}\text{C}\{^1\text{H}\}$  NMR (22°C, 125.75 MHz, thf-d<sub>8</sub>)  $\delta$  149.1, 139.8, 139.7, 137.6, 137.5, 130.4, 129.4, 124.3, 32.4, 31.8, 26.2, 26.0, 25.8, 28.9, 13.3, 8.6;

## 2. DFT calculations

Gaussian 03 (revision E.01) was used for all reported calculations.<sup>6</sup> The B3LYP (DFT) method was used to carry out the geometry optimizations on the model compounds specified in text using the LANL2DZ basis set. The validity of the true minima was checked by the absence of negative frequencies in the energy Hessian. For the optimization of (TMTBM)Ni=N(dmp) the initial structure used was derived from the crystal structure of **7a**.

**Table 1. Select metrical data for (TMTBM)Ni=N(dmp) (7a) DFT & Experimental Solid-State Structure**

| Bond       | DFT (Å) | Structure (Å) | Angle (°)        | DFT (°) | Structure (°) |
|------------|---------|---------------|------------------|---------|---------------|
| Ni(1)-N(1) | 1.706   | 1.732(3)      | C(1)-Ni(1)-C(18) | 89.02   | 89.79(16)     |
| N(1)-C(25) | 1.345   | 1.344(5)      | C(18)-Ni(1)-N(1) | 134.24  | 137.51(16)    |
| C(1)-Ni(1) | 1.930   | 1.872(4)      | C(1)-Ni(1)-N(1)  | 134.17  | 128.70(16)    |
| C(18)-N(1) | 1.929   | 1.885(4)      | Ni(1)-N(1)-C(25) | 145.67  | 127.3(3)      |

**Table 2. Optimized geometry for (TMTBM)Ni=N(dmp) (7a)**

| Atom Number | Atom Type | Coordinates (Angstroms) |           |           |
|-------------|-----------|-------------------------|-----------|-----------|
|             |           | X                       | Y         | Z         |
| 1           | Ni        | 0.107866                | -0.192120 | -0.395978 |
| 2           | C         | -1.470238               | -1.153574 | -0.091856 |
| 3           | N         | -1.603019               | -1.662259 | 1.177383  |
| 4           | C         | -2.818025               | -2.322470 | 1.347778  |
| 5           | C         | -3.457156               | -2.233842 | 0.173722  |
| 6           | C         | -4.852380               | -2.704016 | -0.116202 |
| 7           | H         | -5.205003               | -3.176820 | 0.665755  |
| 8           | H         | -4.842349               | -3.309902 | -0.885798 |
| 9           | H         | -5.423044               | -1.932581 | -0.315238 |
| 10          | N         | -2.625400               | -1.519911 | -0.717663 |
| 11          | C         | -2.727656               | -1.550332 | -2.224910 |
| 12          | C         | -2.382772               | -2.980905 | -2.648156 |
| 13          | H         | -3.030630               | -3.604208 | -2.257003 |
| 14          | H         | -1.482049               | -3.207405 | -2.333499 |
| 15          | H         | -2.413744               | -3.049614 | -3.625281 |
| 16          | C         | -4.121969               | -1.163439 | -2.705191 |
| 17          | H         | -4.318535               | -0.242907 | -2.432070 |
| 18          | H         | -4.786155               | -1.767456 | -2.313009 |
| 19          | H         | -4.159532               | -1.228739 | -3.682526 |
| 20          | C         | -1.759940               | -0.574600 | -2.836277 |
| 21          | H         | -1.996611               | 0.336948  | -2.563604 |
| 22          | H         | -1.801699               | -0.644267 | -3.812920 |
| 23          | H         | -0.850876               | -0.778185 | -2.532992 |
| 24          | C         | -3.197506               | -2.952728 | 2.644610  |
| 25          | H         | -4.080220               | -3.370559 | 2.558953  |

(cont. from previous page)

| Atom<br>Number | Atom<br>Type | Coordinates (Angstroms) |           |           |
|----------------|--------------|-------------------------|-----------|-----------|
|                |              | X                       | Y         | Z         |
| 26             | H            | -3.228685               | -2.267674 | 3.345219  |
| 27             | H            | -2.535873               | -3.635855 | 2.884194  |
| 28             | C            | -0.484831               | -1.610202 | 2.107523  |
| 29             | H            | -0.696754               | -2.137029 | 2.915818  |
| 30             | H            | -0.318271               | -0.675002 | 2.379756  |
| 31             | N            | 0.701076                | -2.156398 | 1.456997  |
| 32             | C            | 1.460400                | -3.249539 | 1.870940  |
| 33             | C            | 2.402566                | -3.426472 | 0.916467  |
| 34             | C            | 3.463931                | -4.483336 | 0.917116  |
| 35             | H            | 3.365067                | -5.043629 | 1.714213  |
| 36             | H            | 4.348248                | -4.061363 | 0.923069  |
| 37             | H            | 3.374118                | -5.040088 | 0.115527  |
| 38             | N            | 2.200095                | -2.412927 | -0.061001 |
| 39             | C            | 1.112529                | -1.648282 | 0.265957  |
| 40             | C            | 2.871029                | -2.349096 | -1.399229 |
| 41             | C            | 2.580657                | -1.008629 | -2.070678 |
| 42             | H            | 2.952653                | -0.282132 | -1.528199 |
| 43             | H            | 1.612395                | -0.886968 | -2.157264 |
| 44             | H            | 2.992791                | -0.996920 | -2.959625 |
| 45             | C            | 4.386241                | -2.490353 | -1.253659 |
| 46             | H            | 4.733472                | -1.753288 | -0.709662 |
| 47             | H            | 4.801958                | -2.464704 | -2.140667 |
| 48             | H            | 4.598329                | -3.342840 | -0.820647 |
| 49             | C            | 2.281740                | -3.484533 | -2.256028 |
| 50             | H            | 1.311098                | -3.366668 | -2.331974 |
| 51             | H            | 2.473697                | -4.348482 | -1.835591 |
| 52             | H            | 2.684166                | -3.460635 | -3.150705 |
| 53             | C            | 1.202340                | -3.993783 | 3.130257  |
| 54             | H            | 1.857689                | -4.717725 | 3.223443  |
| 55             | H            | 0.299055                | -4.373640 | 3.109160  |
| 56             | H            | 1.280648                | -3.384540 | 3.894847  |
| 57             | N            | 0.318981                | 1.514975  | -0.593426 |
| 58             | C            | 0.309901                | 2.470531  | 0.351165  |
| 59             | C            | -0.904656               | 3.025803  | 0.879881  |
| 60             | C            | -2.237042               | 2.554264  | 0.432814  |
| 61             | C            | -2.714886               | 2.871751  | -0.860748 |
| 62             | C            | -3.994316               | 2.493024  | -1.229796 |
| 63             | H            | -4.318654               | 2.736336  | -2.093821 |
| 64             | C            | -4.819213               | 1.772238  | -0.382759 |
| 65             | C            | -4.336587               | 1.422245  | 0.860768  |
| 66             | H            | -4.886392               | 0.902910  | 1.444161  |
| 67             | C            | -3.058512               | 1.807641  | 1.289878  |
| 68             | C            | -2.601743               | 1.410030  | 2.667124  |
| 69             | H            | -1.695440               | 1.748987  | 2.822145  |
| 70             | H            | -2.601380               | 0.432714  | 2.742185  |
| 71             | H            | -3.210599               | 1.787430  | 3.335582  |
| 72             | C            | -6.231132               | 1.396190  | -0.791826 |
| 73             | H            | -6.407502               | 1.724863  | -1.698484 |
| 74             | H            | -6.871574               | 1.798182  | -0.169289 |
| 75             | H            | -6.329263               | 0.420754  | -0.775475 |
| 76             | C            | -1.842345               | 3.623668  | -1.820209 |
| 77             | H            | -2.323358               | 3.759930  | -2.662652 |
| 78             | H            | -1.025131               | 3.110567  | -1.988916 |
| 79             | H            | -1.606059               | 4.493887  | -1.434664 |



(cont. from previous page)

| Atom<br>Number | Atom<br>Type | Coordinates (Angstroms) |           |           |
|----------------|--------------|-------------------------|-----------|-----------|
|                |              | X                       | Y         | Z         |
| 80             | C            | -0.833927               | 3.980804  | 1.904563  |
| 81             | H            | -1.648040               | 4.342753  | 2.249348  |
| 82             | C            | 0.352958                | 4.414803  | 2.427452  |
| 83             | H            | 0.367333                | 5.049881  | 3.139791  |
| 84             | C            | 1.540887                | 3.913250  | 1.900395  |
| 85             | H            | 2.373737                | 4.211220  | 2.261198  |
| 86             | C            | 1.544482                | 2.992485  | 0.861938  |
| 87             | C            | 2.831806                | 2.472632  | 0.321543  |
| 88             | C            | 3.379984                | 3.002580  | -0.851244 |
| 89             | C            | 4.571011                | 2.495992  | -1.353705 |
| 90             | H            | 4.927379                | 2.850481  | -2.166045 |
| 91             | C            | 5.257948                | 1.469799  | -0.687433 |
| 92             | C            | 4.714292                | 0.962749  | 0.467723  |
| 93             | H            | 5.177004                | 0.265906  | 0.930270  |
| 94             | C            | 3.508483                | 1.432466  | 0.990560  |
| 95             | C            | 2.927104                | 0.794893  | 2.218170  |
| 96             | H            | 2.087439                | 1.242083  | 2.451351  |
| 97             | H            | 3.559048                | 0.879249  | 2.962175  |
| 98             | H            | 2.753619                | -0.153765 | 2.042257  |
| 99             | C            | 6.529967                | 0.880463  | -1.273781 |
| 100            | H            | 6.872146                | 0.181243  | -0.677332 |
| 101            | H            | 7.204553                | 1.585568  | -1.369238 |
| 102            | H            | 6.336395                | 0.493152  | -2.153151 |
| 103            | C            | 2.661223                | 4.109711  | -1.596495 |
| 104            | H            | 1.843115                | 4.351244  | -1.114508 |
| 105            | H            | 2.429878                | 3.800738  | -2.496804 |
| 106            | H            | 3.246161                | 4.894245  | -1.659374 |

**Table 3. Geometry for (TMTBM)Ni=N(dipp)+ (7b+)**

Symbolic Z-matrix:

Charge = 1 Multiplicity = 2

| Atom<br>Number | Atom<br>Type | Coordinates (Angstroms) |          |         |
|----------------|--------------|-------------------------|----------|---------|
|                |              | X                       | Y        | Z       |
| 1              | Ni           | 9.08417                 | 15.05299 | 4.01871 |
| 2              | N            | 10.3082                 | 15.90372 | 3.16454 |
| 3              | N            | 6.02979                 | 15.40263 | 4.01958 |
| 4              | N            | 7.09335                 | 15.54878 | 5.87349 |
| 5              | C            | 13.06753                | 15.19065 | 3.94351 |
| 6              | C            | 5.7148                  | 15.10201 | 2.591   |
| 7              | C            | 9.27184                 | 18.13069 | 0.88113 |
| 8              | N            | 9.42887                 | 12.33679 | 5.37954 |
| 9              | C            | 5.75482                 | 15.67759 | 6.20674 |
| 10             | C            | 5.06581                 | 15.59514 | 5.05046 |
| 11             | C            | 7.28168                 | 15.35698 | 4.54357 |
| 12             | C            | 8.20789                 | 15.33185 | 6.77699 |
| 13             | H            | 8.90759                 | 16.01413 | 6.61935 |
| 14             | H            | 7.90175                 | 15.4113  | 7.71513 |
| 15             | C            | 7.41256                 | 19.49826 | 2.43578 |
| 16             | H            | 6.76872                 | 19.95529 | 2.96393 |

|    |   |          |          |          |
|----|---|----------|----------|----------|
| 17 | C | 9.14083  | 13.66667 | 5.29009  |
| 18 | C | 12.59314 | 16.59184 | 3.60785  |
| 19 | C | 13.55355 | 13.43718 | 5.51942  |
| 20 | H | 13.52529 | 13.09657 | 6.40581  |
| 21 | N | 8.74607  | 14.01206 | 6.54503  |
| 22 | C | 9.16658  | 11.86913 | 6.69192  |
| 23 | C | 10.28033 | 17.404   | 0.       |
| 24 | H | 10.95256 | 16.97403 | 0.6027   |
| 25 | C | 9.59211  | 18.48722 | 2.20579  |
| 26 | C | 8.9624   | 19.57186 | 4.42606  |
| 27 | H | 9.86087  | 19.20418 | 4.66547  |
| 28 | C | 13.51855 | 17.61509 | 3.62407  |
| 29 | H | 14.40474 | 17.4247  | 3.90865  |
| 30 | C | 8.64979  | 19.17127 | 3.00055  |
| 31 | C | 9.77305  | 11.49738 | 4.18818  |
| 32 | C | 11.23836 | 16.84681 | 3.20247  |
| 33 | C | 11.91562 | 19.16915 | 2.79095  |
| 34 | H | 11.68846 | 20.04713 | 2.50769  |
| 35 | C | 13.01286 | 14.70124 | 5.25282  |
| 36 | C | 12.37417 | 15.5118  | 6.36021  |
| 37 | H | 11.58928 | 15.99361 | 5.97062  |
| 38 | C | 10.95151 | 18.17811 | 2.74469  |
| 39 | C | 4.8644   | 16.21938 | 2.00124  |
| 40 | H | 5.3524   | 17.0671  | 2.06022  |
| 41 | H | 4.02496  | 16.28998 | 2.50221  |
| 42 | H | 4.66854  | 16.01979 | 1.06201  |
| 43 | C | 13.61351 | 14.87305 | 1.46936  |
| 44 | H | 13.5797  | 15.8724  | 1.4709   |
| 45 | C | 7.10405  | 19.17375 | 1.13151  |
| 46 | H | 6.26025  | 19.41474 | 0.76735  |
| 47 | C | 8.38711  | 13.07781 | 8.85343  |
| 48 | H | 8.43993  | 12.20479 | 9.29564  |
| 49 | H | 7.47529  | 13.42851 | 8.9306   |
| 50 | H | 9.01338  | 13.69887 | 9.28051  |
| 51 | C | 10.30886 | 12.37165 | 3.06281  |
| 52 | H | 9.63239  | 13.03605 | 2.81507  |
| 53 | H | 10.51739 | 11.81251 | 2.2856   |
| 54 | H | 11.12148 | 12.82939 | 3.36339  |
| 55 | C | 8.74118  | 12.92706 | 7.41279  |
| 56 | C | 8.0284   | 18.49554 | 0.35408  |
| 57 | H | 7.8159   | 18.27613 | -0.54547 |
| 58 | C | 14.16319 | 13.15531 | 3.23974  |
| 59 | H | 14.55227 | 12.62025 | 2.55812  |
| 60 | C | 13.20343 | 18.91878 | 3.23864  |
| 61 | H | 13.85097 | 19.61274 | 3.28161  |
| 62 | C | 3.58174  | 15.65848 | 4.90335  |
| 63 | H | 3.17179  | 15.79526 | 5.78295  |
| 64 | H | 3.25553  | 14.81855 | 4.51792  |
| 65 | H | 3.34348  | 16.40322 | 4.31249  |
| 66 | C | 7.01199  | 15.03282 | 1.77893  |
| 67 | H | 7.46579  | 15.90071 | 1.81335  |
| 68 | H | 6.80306  | 14.81041 | 0.84759  |
| 69 | H | 7.5972   | 14.34311 | 2.15603  |
| 70 | C | 13.64415 | 14.40734 | 2.91438  |
| 71 | C | 9.3182   | 10.47096 | 7.20298  |
| 72 | H | 9.05802  | 10.43822 | 8.14725  |
| 73 | H | 10.25233 | 10.18909 | 7.11155  |
| 74 | H | 8.74343  | 9.86971  | 6.68469  |
| 75 | C | 5.29244  | 15.87877 | 7.61011  |

|     |   |          |          |          |
|-----|---|----------|----------|----------|
| 76  | H | 4.31565  | 15.95751 | 7.62414  |
| 77  | H | 5.69129  | 16.69783 | 7.97142  |
| 78  | H | 5.56635  | 15.11315 | 8.15734  |
| 79  | C | 13.33973 | 16.56937 | 6.92454  |
| 80  | H | 13.67215 | 17.13133 | 6.19381  |
| 81  | H | 14.09425 | 16.12242 | 7.36215  |
| 82  | H | 12.86758 | 17.12761 | 7.57722  |
| 83  | C | 14.12264 | 12.68147 | 4.52801  |
| 84  | H | 14.48927 | 11.82915 | 4.73212  |
| 85  | C | 12.3492  | 14.36505 | 0.78642  |
| 86  | H | 12.33587 | 14.67009 | -0.1447  |
| 87  | H | 11.5622  | 14.71274 | 1.2556   |
| 88  | H | 12.33666 | 13.38533 | 0.80944  |
| 89  | C | 5.01892  | 13.74169 | 2.52545  |
| 90  | H | 4.18543  | 13.77602 | 3.03979  |
| 91  | H | 5.60756  | 13.05499 | 2.90276  |
| 92  | H | 4.81778  | 13.52229 | 1.5917   |
| 93  | C | 14.84863 | 14.44538 | 0.65816  |
| 94  | H | 15.65862 | 14.78564 | 1.09248  |
| 95  | H | 14.78629 | 14.81094 | -0.24906 |
| 96  | H | 14.88799 | 13.46726 | 0.61432  |
| 97  | C | 11.8657  | 14.66178 | 7.53184  |
| 98  | H | 11.23823 | 13.98693 | 7.19772  |
| 99  | H | 11.41045 | 15.23843 | 8.18036  |
| 100 | H | 12.62338 | 14.21678 | 7.96572  |
| 101 | C | 7.93252  | 18.98549 | 5.38941  |
| 102 | H | 8.14912  | 19.25868 | 6.30518  |
| 103 | H | 7.94758  | 18.00754 | 5.32802  |
| 104 | H | 7.03986  | 19.31389 | 5.15306  |
| 105 | C | 8.50531  | 10.79405 | 3.72624  |
| 106 | H | 7.81868  | 11.46182 | 3.5184   |
| 107 | H | 8.1816   | 10.20342 | 4.43812  |
| 108 | H | 8.69905  | 10.26429 | 2.92491  |
| 109 | C | 8.99133  | 21.02985 | 4.62842  |
| 110 | H | 9.68073  | 21.42566 | 4.05554  |
| 111 | H | 9.19471  | 21.22537 | 5.56699  |
| 112 | H | 8.11755  | 21.40903 | 4.39778  |
| 113 | C | 10.87398 | 10.48299 | 4.5291   |
| 114 | H | 10.56335 | 9.89289  | 5.24734  |
| 115 | H | 11.67789 | 10.96019 | 4.82332  |
| 116 | H | 11.08331 | 9.94881  | 3.73479  |
| 117 | C | 9.66105  | 16.31051 | -0.84825 |
| 118 | H | 9.19154  | 15.67441 | -0.26923 |
| 119 | H | 10.36551 | 15.84303 | -1.34373 |
| 120 | H | 9.0258   | 16.70756 | -1.4801  |
| 121 | C | 11.02349 | 18.40158 | -0.8796  |
| 122 | H | 11.42234 | 19.09873 | -0.3179  |
| 123 | H | 10.39615 | 18.81049 | -1.51167 |
| 124 | H | 11.73019 | 17.93729 | -1.37509 |

### 3. Crystallographic Experimental Section and Tables

**Data collection:** Suitable crystals of **5**, **6**, **7a**, or **7b** were selected under a stereomicroscope while they were immersed in mineral oil to minimize contact with air

or water. The crystal was removed from the oil using a tapered fiber that also served to hold the crystal for data collection. The crystal was mounted on a Bruker SMART APEX system. Rotation and still images showed diffractions to be sharp. Frames separated in reciprocal space were obtained and provided an orientation matrix and the initial cell parameters. Final cell parameters were obtained from the full data set. A hemisphere data set was obtained of reciprocal space to a resolution of 0.84 Å using 0.3° steps in  $\omega$  using 10 (2) second integration times for each frame. Data collection was made at 100 K. Integration of intensities and refinement of cell parameters were done using SAINT. Absorption corrections were applied using psi- scan. Observation during and after data collection showed that crystal was still clear suggesting no decomposition.

**Table 4. Crystal data and structure refinement for (TMTBM)Ni( $\eta^2$ -cod) (5)**

|                                         |                                                   |                |
|-----------------------------------------|---------------------------------------------------|----------------|
| <b>Identification code</b>              | Nicole40                                          |                |
| <b>Empirical formula</b>                | C <sub>27</sub> H <sub>44</sub> N <sub>4</sub> Ni |                |
| <b>Formula weight</b>                   | 483.37                                            |                |
| <b>Temperature</b>                      | 100(2) K                                          |                |
| <b>Wavelength</b>                       | 0.71073 Å                                         |                |
| <b>Crystal system</b>                   | Orthorhombic                                      |                |
| <b>Space group</b>                      | Fdd2                                              |                |
| <b>Unit cell dimensions</b>             | $a = 17.8294(19)$ Å                               | $a = 90^\circ$ |
|                                         | $b = 42.047(5)$ Å                                 | $b = 90^\circ$ |
|                                         | $c = 17.6823(19)$ Å                               | $c = 90^\circ$ |
| <b>Volume</b>                           | 13256(3) Å <sup>3</sup>                           |                |
| <b>Z</b>                                | 16                                                |                |
| <b>Density (calculated)</b>             | 0.969 g/cm <sup>3</sup>                           |                |
| <b>Absorption coefficient</b>           | 0.602 mm <sup>-1</sup>                            |                |
| <b>F(000)</b>                           | 3487                                              |                |
| <b>Crystal size</b>                     | 0.6 x 0.2 x 0.2 mm <sup>3</sup>                   |                |
| <b>Theta range for data collection</b>  | 2.18 to 28.28°                                    |                |
| <b>Index ranges</b>                     | -23 ≤ h ≤ 17, -56 ≤ k ≤ 51, -23 ≤ l ≤ 23          |                |
| <b>Reflections collected</b>            | 20306                                             |                |
| <b>Independent reflections</b>          | 7756 [R(int) = 0.0847]                            |                |
| <b>Completeness to theta = 25.00°</b>   | 99.9%                                             |                |
| <b>Absorption correction</b>            | Empirical                                         |                |
| <b>Refinement method</b>                | Full-matrix least-squares on F <sup>2</sup>       |                |
| <b>Data / restraints / parameters</b>   | 7756 / 1 / 289                                    |                |
| <b>Goodness-of-fit on F<sup>2</sup></b> | 1.065                                             |                |
| <b>Final R indices [I &gt; 2σ(I)]</b>   | R1 = 0.0576, wR2 = 0.1542                         |                |
| <b>R indices (all data)</b>             | R1 = 0.0604, wR2 = 0.1566                         |                |
| <b>Largest diff. peak and hole</b>      | 0.756 and -0.546 e.Å <sup>-3</sup>                |                |

**(TMTBM)Ni( $\eta^2$ -cod) (5)**. The space group was determined to be Fdd2 based on systematic absences and intensity statistics. Direct methods were used to locate C, Ni, and N atoms. All non-hydrogen atoms were refined anisotropically. Hydrogen atoms were placed at idealized positions and refined isotropically using a riding model. See Table 3 (SI-10) for crystal and refinement data. The solvent molecules (Et<sub>2</sub>O) were disordered and could not be modeled properly, thus the SQUEEZE/PLATON3 program was used to calculate the solvent disorder area and remove its contribution to the overall intensity data. One of the *tert*-butyl groups of the TMTBM ligand also presents some degree of rotational disorder.

**Figure 1: Fully labeled ORTEP for (TMTBM)Ni( $\eta^2$ -cod) (5)**

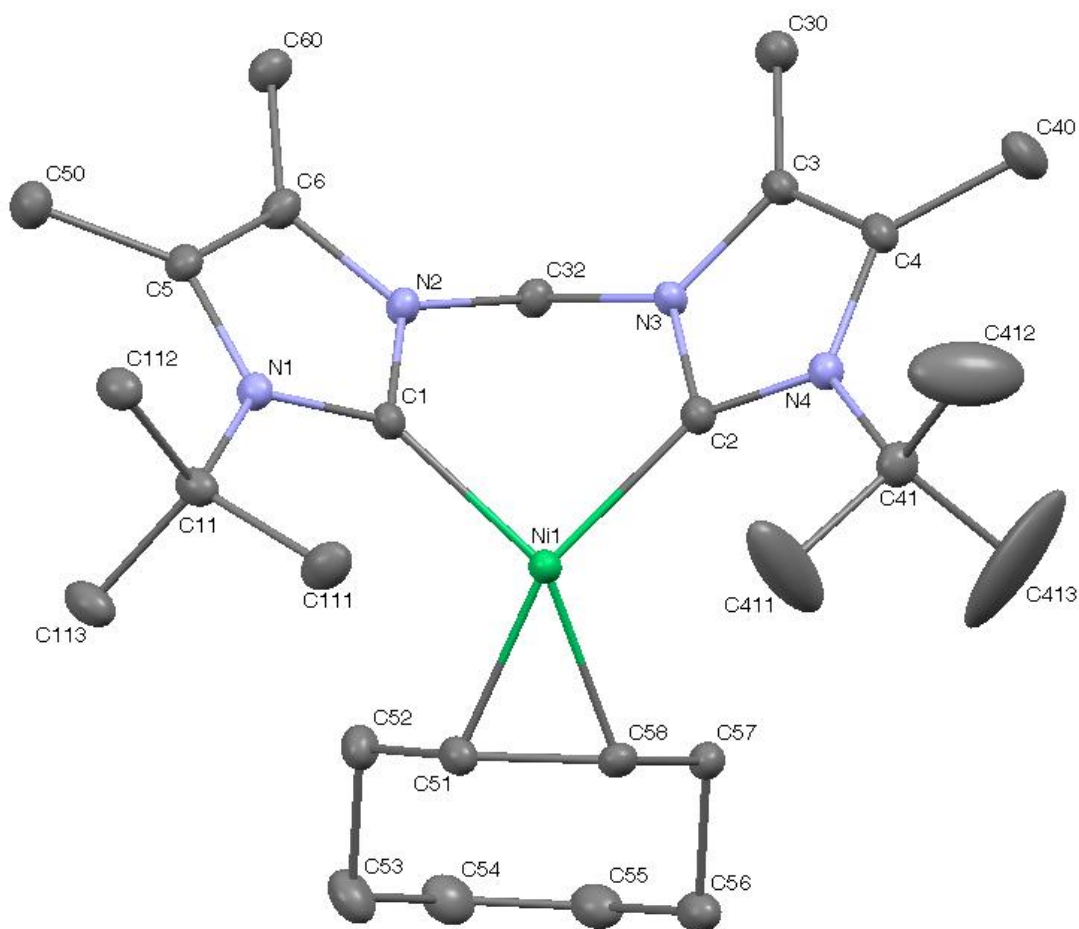

**Table 5. Crystal data and structure refinement for (TMTBM)Ni( $\eta^2$ -N<sub>3</sub>Ar) (6)**

|                                         |                                                   |                             |
|-----------------------------------------|---------------------------------------------------|-----------------------------|
| <b>Identification code</b>              | Nicole712                                         |                             |
| <b>Empirical formula</b>                | C <sub>31</sub> H <sub>49</sub> N <sub>7</sub> Ni |                             |
| <b>Formula weight</b>                   | 578.46                                            |                             |
| <b>Temperature</b>                      | 100(2) K                                          |                             |
| <b>Wavelength</b>                       | 0.71073 Å                                         |                             |
| <b>Crystal system</b>                   | Triclinic                                         |                             |
| <b>Space group</b>                      | P-1                                               |                             |
| <b>Unit cell dimensions</b>             | $a = 12.1740(13)$ Å                               | $\alpha = 112.359(2)^\circ$ |
|                                         | $b = 26.324(3)$ Å                                 | $\beta = 99.666(2)^\circ$   |
|                                         | $c = 31.697(3)$ Å                                 | $\gamma = 92.719(2)^\circ$  |
| <b>Volume</b>                           | 9191.5(17) Å <sup>3</sup>                         |                             |
| <b>Z</b>                                | 10                                                |                             |
| <b>Density (calculated)</b>             | 1.041 g/cm <sup>3</sup>                           |                             |
| <b>Absorption coefficient</b>           | 0.550 mm <sup>-1</sup>                            |                             |
| <b>F(000)</b>                           | 3119                                              |                             |
| <b>Crystal size</b>                     | 0.6 x 0.2 x 0.2 mm <sup>3</sup>                   |                             |
| <b>Theta range for data collection</b>  | 1.33 to 28.33°                                    |                             |
| <b>Index ranges</b>                     | -16 ≤ h ≤ 15, -30 ≤ k ≤ 34, -41 ≤ l ≤ 40          |                             |
| <b>Reflections collected</b>            | 45871                                             |                             |
| <b>Independent reflections</b>          | 45871 [R(int) = 0.0960]                           |                             |
| <b>Completeness to theta = 25.00°</b>   | 98.6%                                             |                             |
| <b>Absorption correction</b>            | Empirical                                         |                             |
| <b>Refinement method</b>                | Full-matrix least-squares on F <sup>2</sup>       |                             |
| <b>Data / restraints / parameters</b>   | 42427 / 0 / 1756                                  |                             |
| <b>Goodness-of-fit on F<sup>2</sup></b> | 1.032                                             |                             |
| <b>Final R indices [I &gt; 2σ(I)]</b>   | R1 = 0.0854, wR2 = 0.2299                         |                             |
| <b>R indices (all data)</b>             | R1 = 0.1602, wR2 = 0.1781                         |                             |
| <b>Largest diff. peak and hole</b>      | 0.837 and -0.605 e.Å <sup>-3</sup>                |                             |

(TMTBM)Ni( $\eta^2$ -N<sub>3</sub>Ar) (**6**). The space group was determined to be Fdd2 based on systematic absences and intensity statistics. Direct methods were used to locate C, Ni, and N atoms. All non-hydrogen atoms were refined anisotropically. Hydrogen atoms were placed at idealized positions and refined isotropically using a riding model. See Table 4 (SI-12) for crystal and refinement data. There were five independent molecules in the unit cell, one of which is shown below. The solvent molecules (Et<sub>2</sub>O) were disordered and could not be modeled properly, thus the SQUEEZE/PLATON3 program was used to calculate the solvent disorder area and remove its contribution to the overall intensity data.

**Figure 2: Fully labeled ORTEP for (TMTBM)Ni( $\eta^2$ -N<sub>3</sub>Ar) (**6**)**

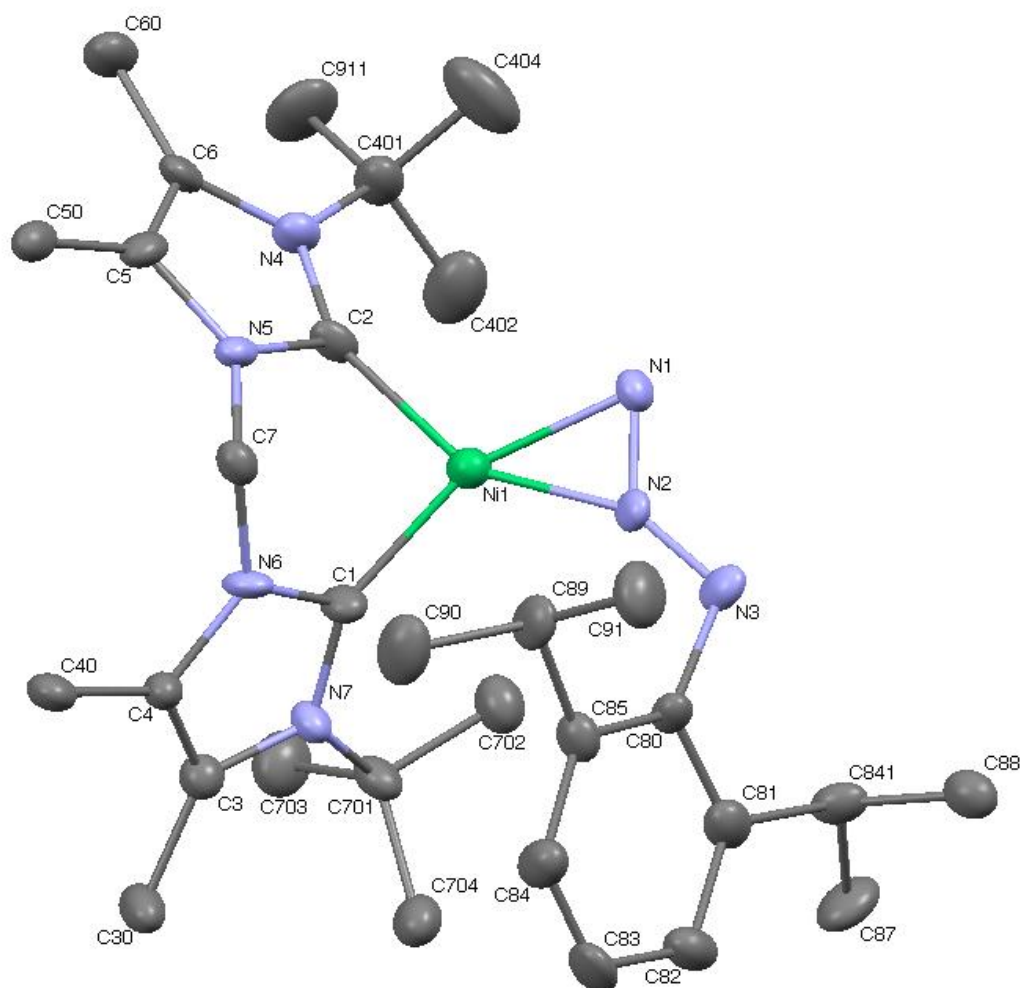



**Table 6. Crystal data and structure refinement for (TMTBM)Ni=N(dmp) (7a)**

|                                         |                                                                                                                                                               |
|-----------------------------------------|---------------------------------------------------------------------------------------------------------------------------------------------------------------|
| <b>Identification code</b>              | Nicole84                                                                                                                                                      |
| <b>Empirical formula</b>                | C <sub>43</sub> H <sub>57</sub> N <sub>5</sub> Ni                                                                                                             |
| <b>Formula weight</b>                   | 702.64                                                                                                                                                        |
| <b>Temperature</b>                      | 100(2) K                                                                                                                                                      |
| <b>Wavelength</b>                       | 0.71073 Å                                                                                                                                                     |
| <b>Crystal system</b>                   | Triclinic                                                                                                                                                     |
| <b>Space group</b>                      | P-1                                                                                                                                                           |
| <b>Unit cell dimensions</b>             | $a = 10.911(2) \text{ \AA}$ $a = 103.994(4)^\circ$<br>$b = 12.339(2) \text{ \AA}$ $b = 97.621(4)^\circ$<br>$c = 15.869(5) \text{ \AA}$ $c = 107.921(3)^\circ$ |
| <b>Volume</b>                           | 1922.2(7) Å <sup>3</sup>                                                                                                                                      |
| <b>Z</b>                                | 2                                                                                                                                                             |
| <b>Density (calculated)</b>             | 1.214 g/cm <sup>3</sup>                                                                                                                                       |
| <b>Absorption coefficient</b>           | 0.541 mm <sup>-1</sup>                                                                                                                                        |
| <b>F(000)</b>                           | 1584                                                                                                                                                          |
| <b>Crystal size</b>                     | 0.6 x 0.2 x 0.2 mm <sup>3</sup>                                                                                                                               |
| <b>Theta range for data collection</b>  | 1.59 to 25.00°                                                                                                                                                |
| <b>Index ranges</b>                     | -13 ≤ h ≤ 13, -27 ≤ k ≤ 26, -9 ≤ l ≤ 18                                                                                                                       |
| <b>Reflections collected</b>            | 21583                                                                                                                                                         |
| <b>Independent reflections</b>          | 7264 [R(int) = 0.0418]                                                                                                                                        |
| <b>Completeness to theta = 25.00°</b>   | 98.6%                                                                                                                                                         |
| <b>Absorption correction</b>            | Empirical                                                                                                                                                     |
| <b>Refinement method</b>                | Full-matrix least-squares on F <sup>2</sup>                                                                                                                   |
| <b>Data / restraints / parameters</b>   | 7264 / 0 / 502                                                                                                                                                |
| <b>Goodness-of-fit on F<sup>2</sup></b> | 1.002                                                                                                                                                         |
| <b>Final R indices [I &gt; 2σ(I)]</b>   | R1 = 0.0637, wR2 = 0.1006                                                                                                                                     |
| <b>R indices (all data)</b>             | R1 = 0.0455, wR2 = 0.0956                                                                                                                                     |
| <b>Largest diff. peak and hole</b>      | 0.810 and -0.461 e.Å <sup>-3</sup>                                                                                                                            |



**Table 7. Crystal data and structure refinement for (TMTBM)Ni=N(dipp)**

|                         |                                                   |                                                                |                                  |
|-------------------------|---------------------------------------------------|----------------------------------------------------------------|----------------------------------|
| Identification code     | Nicole740a                                        | Crystal size                                                   | 0.6 x 0.2 x 0.2 mm <sup>2</sup>  |
| Empirical formula       | C <sub>49</sub> H <sub>69</sub> N <sub>5</sub> Ni | Theta range for data collection                                | 1.48 to 28.33 °                  |
| Formula weight          | 786.8                                             | Index ranges                                                   | -17 ≤ h ≤ 17                     |
| Temperature             | 100(2)                                            |                                                                | -23 ≤ k ≤ 23                     |
| Wavelength              | 0.71073 Å                                         |                                                                | -19 ≤ l ≤ 29                     |
| Crystal system          | Orthorhombic                                      | Reflections collected                                          | 32704                            |
| Space group             | P2(1)2(1)2(1)                                     | Independent reflections                                        | 12325                            |
| Unit cell dimensions    | a = 13.2070(10) Å                                 | Completeness to theta = 25.00°                                 | 98.1 %                           |
|                         | b = 17.6940(14) Å                                 | Absorption correction                                          | psi-scan                         |
|                         | c = 21.9242(17) Å                                 | Max. and min. transmission                                     | 0.9204 and 0.7860                |
|                         | α = 90.00 °                                       | Refinement method: Full-matrix least-squares on F <sup>2</sup> |                                  |
|                         | β = 90.00 °                                       | Data / restraints / parameters                                 | 12325 / 0 / 496                  |
|                         | γ = 90.00 °                                       | Goodness-of-fit on F <sup>2</sup>                              | 1.045                            |
| Volume                  | 5123.3(7)                                         | Final R indices [I > 2σ(I)]                                    | R1 = 0.0574                      |
| Z                       | 4                                                 |                                                                | wR2 = 0.0854                     |
| Density (calculated)    | 1.020 mg/m <sup>3</sup>                           | R indices (all data)                                           | R1 = 0.0833                      |
| Absorptions coefficient | 0.412 mm <sup>-1</sup>                            |                                                                | wR2 = 0.0905                     |
| F(000)                  | 1704.0                                            | Largest diff. peak hole                                        | 1.316 & -0.644 e.Å <sup>-3</sup> |

**(TMTBM)Ni=N(dipp)** (**7b**). The space group was determined to be  $P2(1)2(1)2(1)$  based on systematic absences and intensity statistics. Direct methods were used to locate Ni, C, and N atoms. All non-hydrogen atoms were refined anisotropically. All hydrogen atoms were fixed at calculated positions and refined isotropically. Contributions of disordered solvent molecules were removed from the diffraction data with SQUEEZE.

**Figure 4: Fully labeled ORTEP for (TMTBM)Ni=N(dipp) (7b)**

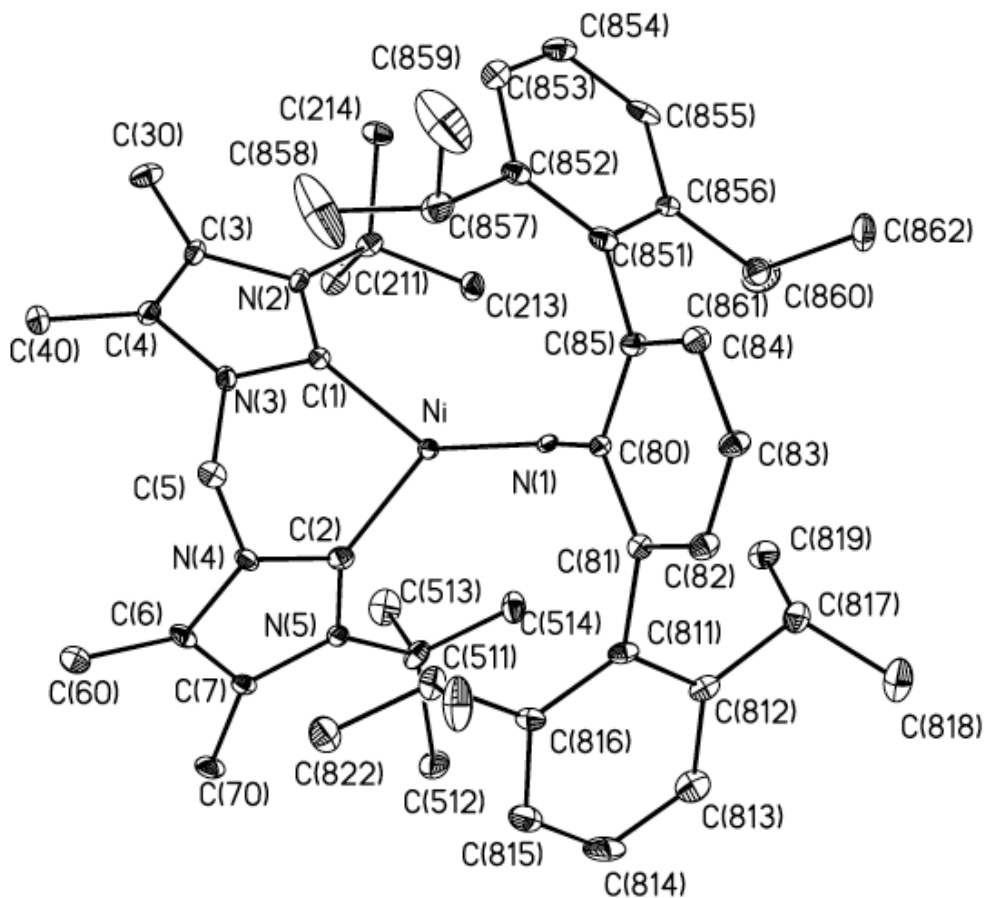

**Table 8. Crystal data and structure refinement for [(TMTBM)Ni=N(dipp)]<sub>2</sub>[B(C<sub>6</sub>F<sub>5</sub>)<sub>4</sub>]<sub>2</sub> (9)**

|                         |                                                                                                                 |                                                                |                                              |
|-------------------------|-----------------------------------------------------------------------------------------------------------------|----------------------------------------------------------------|----------------------------------------------|
| Identification code     | Nicole867a                                                                                                      | Crystal size                                                   | 0.6 x 0.2 x 0.2 mm <sup>2</sup>              |
| Empirical formula       | C <sub>146</sub> H <sub>136</sub> N <sub>10</sub> Ni <sub>2</sub><br>B <sub>2</sub> F <sub>20</sub>             | Theta range for data collection                                | 1.75 to 25.00 °                              |
| Formula weight          | 2929.65                                                                                                         | Index ranges                                                   | -17 ≤ h ≤ 17<br>-18 ≤ k ≤ 18<br>-19 ≤ l ≤ 19 |
| Temperature             | 100(2)                                                                                                          | Reflections collected                                          | 23669                                        |
| Wavelength              | 0.71073 Å                                                                                                       | Independent reflections                                        | 13101                                        |
| Crystal system          | Triclinic                                                                                                       | Completeness to theta = 25.00°                                 | 98.9 %                                       |
| Space group             | P-1                                                                                                             | Absorption correction                                          | psi-scan                                     |
| Unit cell dimensions    | a = 14.779(2) Å<br>b = 15.500(2) Å<br>c = 16.733(3) Å<br>α = 92.778(4) °<br>β = 98.247(3) °<br>γ = 100.522(4) ° | Max. and min. transmission                                     | 0.9242 and 0.7952                            |
| Volume                  | 3718.6(10)                                                                                                      | Refinement method: Full-matrix least-squares on F <sup>2</sup> |                                              |
| Z                       | 1                                                                                                               | Data / restraints / parameters                                 | 6295 / 0 / 448                               |
| Density (calculated)    | 1.308 mg/m <sup>3</sup>                                                                                         | Goodness-of-fit on F <sup>2</sup>                              | 0.982                                        |
| Absorptions coefficient | 0.354 mm <sup>-1</sup>                                                                                          | Final R indices [I > 2σ(I)]                                    | R1 = 0.0879<br>wR2 = 0.2298                  |
| F(000)                  | 1508                                                                                                            | R indices (all data)                                           | R1 = 0.1879<br>wR2 = 0.2298                  |
|                         |                                                                                                                 | Largest diff. peak hole                                        | 0.517 & -0.223 e.Å <sup>-3</sup>             |

**$[(\text{TMTBM})\text{Ni}=\text{N}(\text{dipp})]_2[\text{B}(\text{C}_6\text{F}_5)_4]_2$  (9)**

The space group was determined to be P-1 based on systematic absences and intensity statistics. Direct methods were used to locate Ni, C, N, B, and F atoms. All non-hydrogen atoms were refined anisotropically. All hydrogen atoms were fixed at calculated positions and refined isotropically.

**Figure 5: Fully labeled ORTEP for  $[(\text{TMTBM})\text{Ni}=\text{N}(\text{dipp})]_2[\text{B}(\text{C}_6\text{F}_5)_4]_2$  (9)**

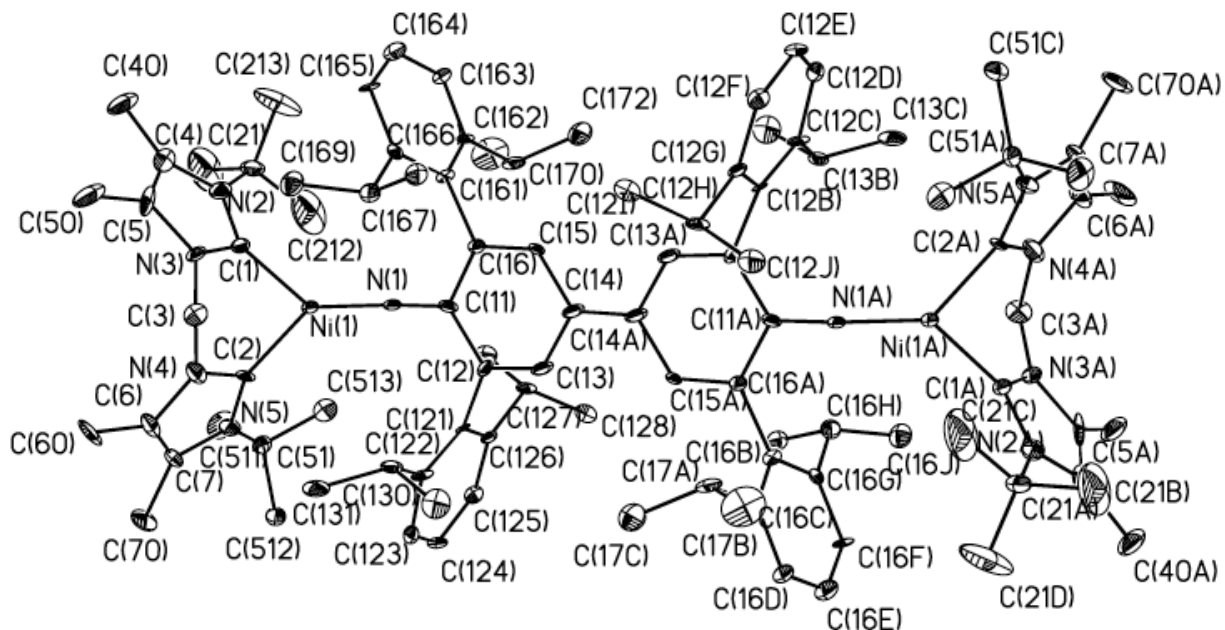

#### 4. References

1. Pangborn, A. B.; Giardello, M. A.; Grubbs, R. H.; Rosen, R. K.; Trimmers, F. J. *Organometallics* **1996**, *15*, 1518.
2. (a) Du, C. F.; Hart, H.; Ng, K. D. *J. Org. Chem.* **1986**, *51*, 3162. (b) Gavenonis, J.; Tilley, T. D. *J. Am. Chem. Soc.* **2002**, *124*, 8536.
3. (a) Smith, P. A. S.; Rowe, C. D.; Bruner, L. B. *J. Org. Chem.* **1969**, *34*, 3430. (b) Ranu, B. C.; Sarkar, A.; Chakraborty, R. *J. Org. Chem.* **1994**, *59*, 4114. (c) Miller, J. A. *Tet. Lett.* **1975**, *34*, 2959. (d) Mindiola, D. J.; Waterman, R.; Jenkins, D. M.; Hillhouse, G. L. *Inorg. Chim. Acta* **2003**, *345*, 299.
4. All software and sources of scattering factors are contained in the SHELXTL (version 1.5.1) program library (G. Sheldrick, Bruker Analytical X-ray Systems, Madison, WI).
5. Millar, R. W.; Philbin, S. P.; Claridge, R. P.; Hamid, J.; *Propellants, Explos., Pyrotech.* **2004**, *29*, 81.
6. M. J. Frisch, G. W. Trucks, H. B. Schlegel, G. E. Scuseria, M. A. Robb, J. R. Cheeseman, J. A. Montgomery, Jr., T. Vreven, K. N. Kudin, J. C. Burant, J. M. Millam, S. S. Iyengar, J. Tomasi, V. Barone, B. Mennucci, M. Cossi, G. Scalmani, N. Rega, G. A. Petersson, H. Nakatsuji, M. Hada, M. Ehara, K. Toyota, R. Fukuda, J. Hasegawa, M. Ishida, T. Nakajima, Y. Honda, O. Kitao, H. Nakai, M. Klene, X. Li, J. E. Knox, H. P. Hratchian, J. B. Cross, V. Bakken, C. Adamo, J. Jaramillo, R. Gomperts, R. E. Stratmann, O. Yazyev, A. J. Austin, R. Cammi, C. Pomelli, J. W. Ochterski, P. Y. Ayala, K. Morokuma, G. A. Voth, P. Salvador, J. J. Dannenberg, V. G. Zakrzewski, S. Dapprich, A. D. Daniels, M. C. Strain, O. Farkas, D. K. Malick, A. D. Rabuck, K. Raghavachari, J. B. Foresman, J. V. Ortiz, Q. Cui, A. G. Baboul, S. Clifford, J. Cioslowski, B. B. Stefanov, G. Liu, A. Liashenko, P. Piskorz, I. Komaromi, R. L. Martin, D. J. Fox, T. Keith, M. A. Al-Laham, C. Y. Peng, A. Nanayakkara, M. Challacombe, P. M. W. Gill, B. Johnson, W. Chen, M. W. Wong, C. Gonzalez, and J. A. Pople, Gaussian, Inc., Wallingford CT, 2004.

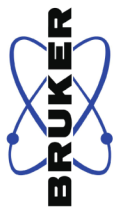

Current Data Parameters  
NAME nh-4-157  
EXPNO 1  
PROCNO 1

F2 - Acquisition Parameters  
Date\_ 20091006  
Time 4.01  
INSTRUM spect  
PROBHD 5 mm BBO BB-1H  
PULPROG zgpg30  
SOLVENT CDCl3  
NS 4  
DS 0  
SWH 10000.000 Hz  
FIDRES 0.260010 Hz  
AQ 1.9230500 sec  
RG 71.8  
DW 50.000 usec  
DE 111.43 usec  
TE 295.4 K  
D1 4.00000000 sec  
TD0 1

===== CHANNEL f1 =====  
NUC1 1H  
PI 8.00 usec  
PL1 -6.00 dB  
SFO1 400.1300000 MHz  
F2 - Processing parameters  
SI 32768  
SF 400.1300087 MHz  
WDW EM  
SSB 0  
LB 0 Hz  
GB 0  
PC 1.00

0.991  
1.520  
1.556  
2.083  
2.248

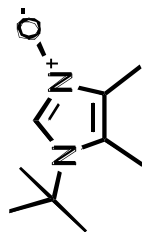

7.260  
7.856

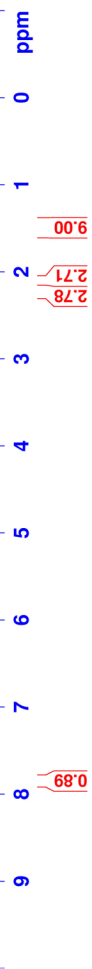



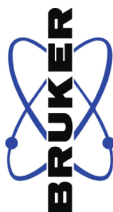

Current Data Parameters  
Date\_ 20091031  
Time\_ 5.00  
INSTRUM spect  
PROBHD 5 mm BBO BB-1H  
PULPROG zg  
TD 38460  
SOLVENT CDCl3  
NS 4  
DS 0

F2 - Acquisition Parameters  
Date\_ 20091031  
Time\_ 5.00  
INSTRUM spect  
PROBHD 5 mm BBO BB-1H  
PULPROG zg  
TD 38460  
SOLVENT CDCl3  
NS 4  
DS 0  
SWH 6410.256 Hz  
FIDRES 0.166673 Hz  
AQ 2.9999299 sec  
RG 45.3  
DW 78.000 usec  
DE 111.43 usec  
TE 295.2 K  
D1 4.0000000 sec  
TD0 1

===== CHANNEL f1 =====  
NUC1 1H  
P1 8.00 usec  
PL1 -6.00 dB  
SFO1 400.1326008 MHz

F2 - Processing Parameters  
SI 32768  
SF 400.1300067 MHz  
SWH 0  
SFB 0 Hz  
GB 0  
PC 1.00

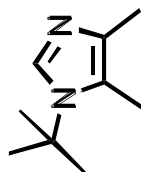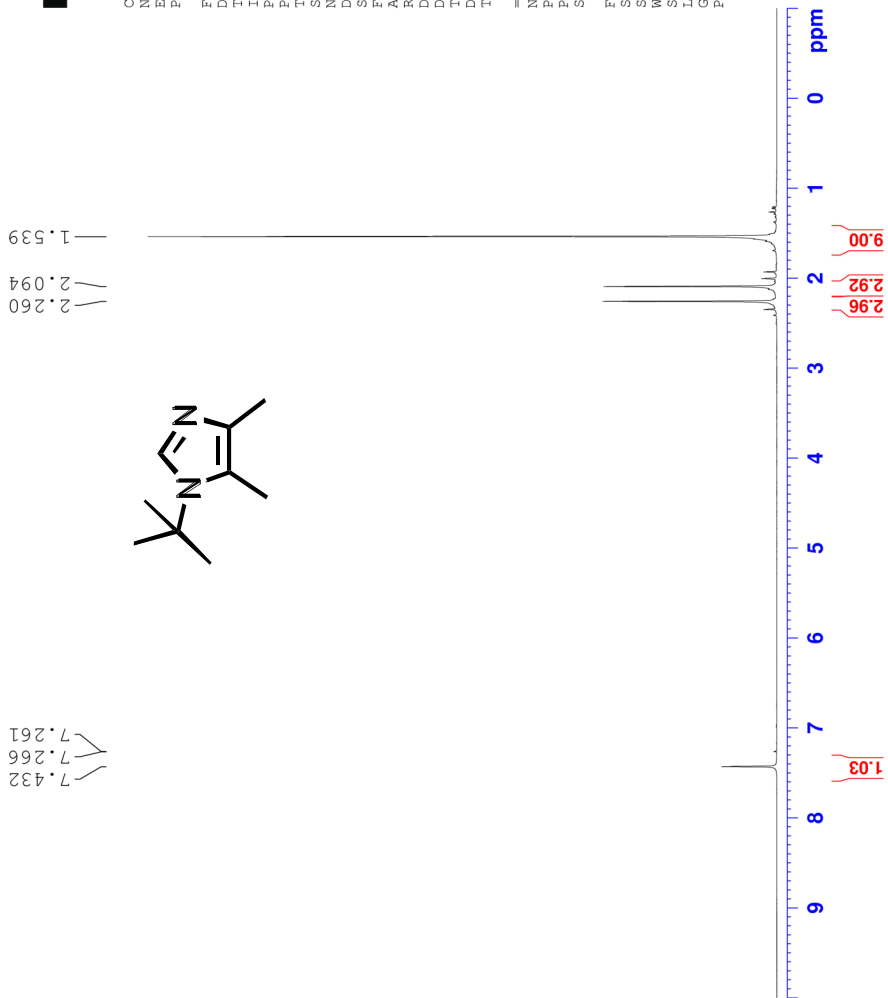

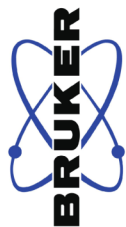

Current Data Parameters  
NAME TMTMBEr2sai1  
EXPNO 1  
PROCNO 1

F2 - Acquisition Parameters  
Date\_ 20100829  
Time 13.41  
INSIRUM Spect  
PROBHD 5 mm BBO BE-IH  
PULPROG zg  
TD 38460  
SOLVENT CDC13  
NS 8  
DS 0  
SWH 10416.667 Hz  
FIDRES 0.270844 Hz  
AQ 1.8461300 sec  
RG 80.6  
DW 48.000 usec  
DE 111.43 usec  
TE 296.3 K  
D1 7.00000000 sec  
TD0 1

===== CHANNEL f1 =====  
NUC1 1H  
P1 8.00 usec  
PL1 -6.00 dB  
SF01 400.1326008 MHz

F2 - Processing parameters  
SI 32768  
SF 400.1300091 MHz  
WDW EM  
SSB 0  
LB 0 Hz  
GB 0  
PC 1.00

1.688  
1.714  
2.384  
2.424

7.530

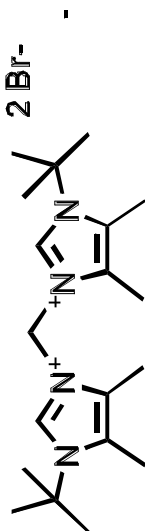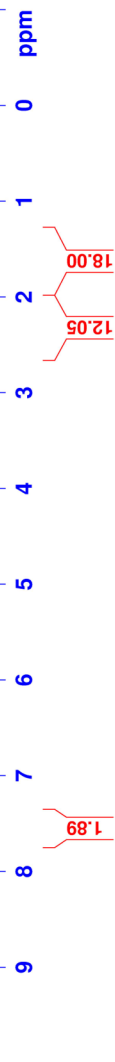

W

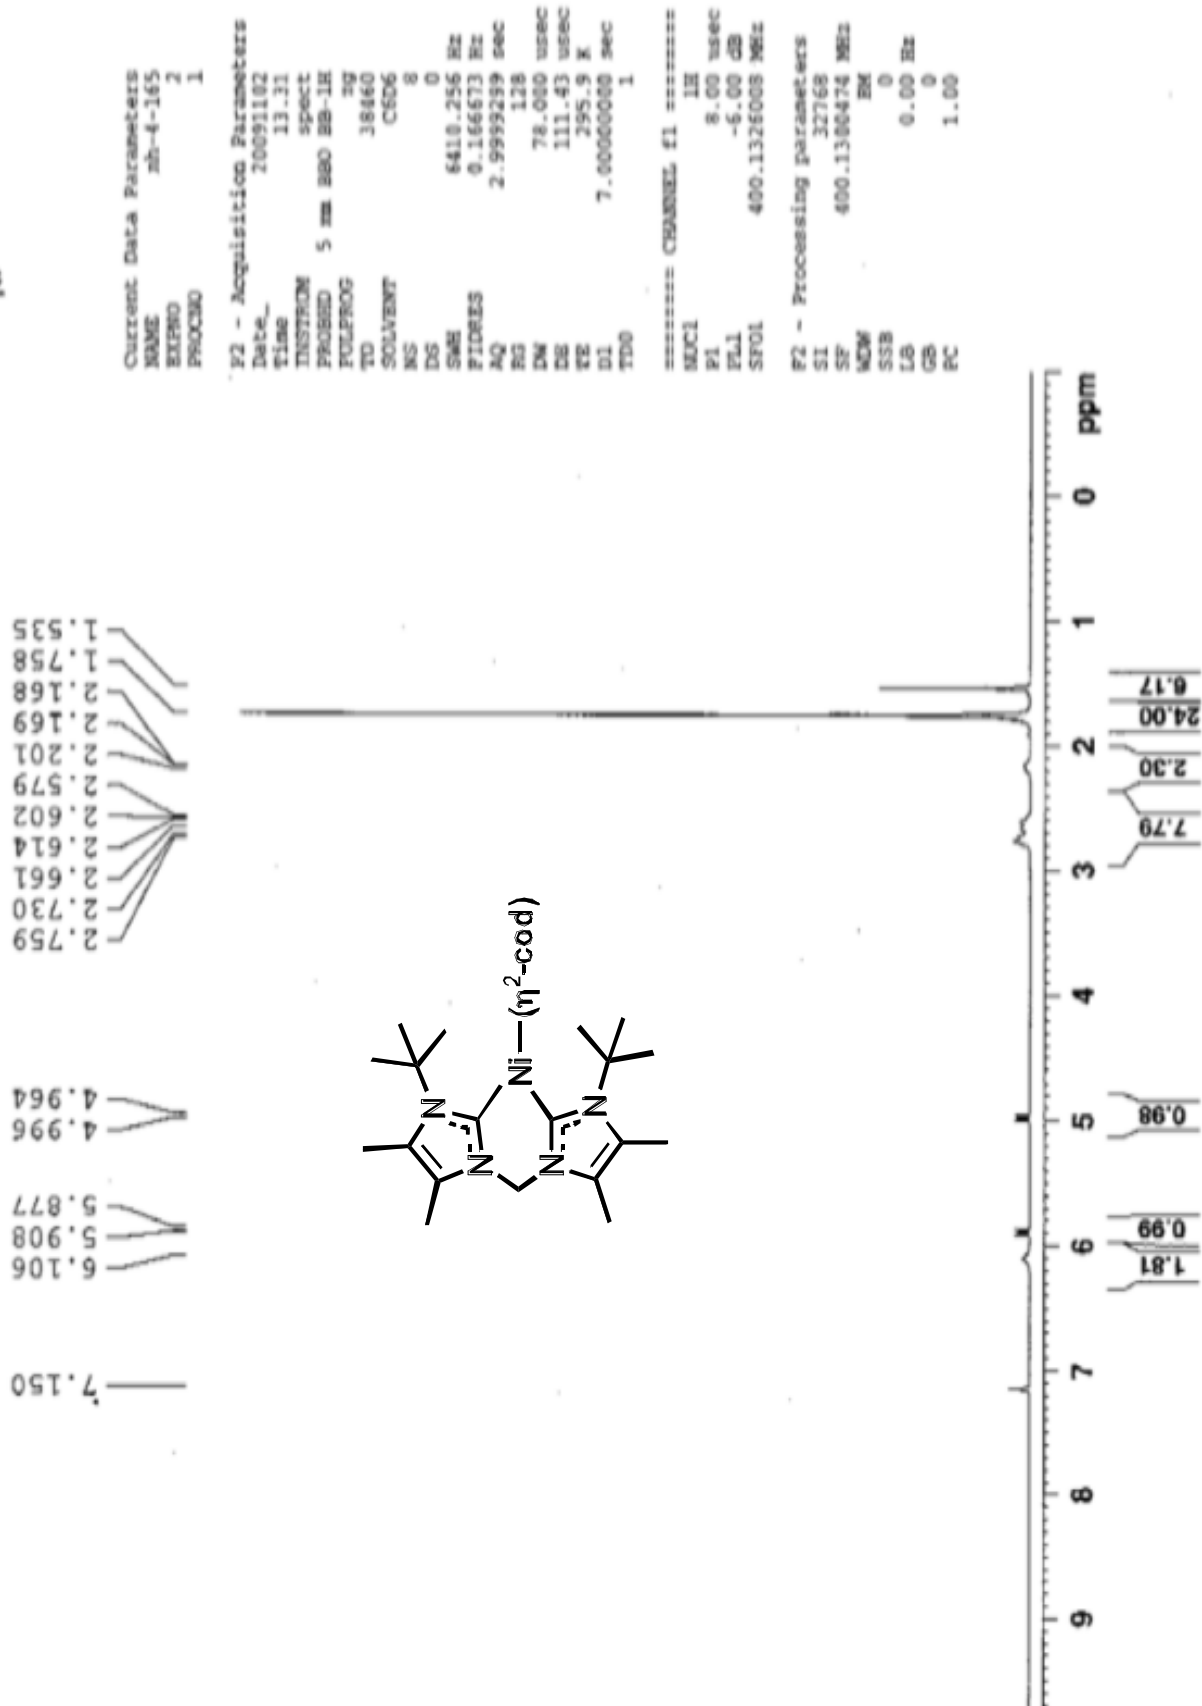

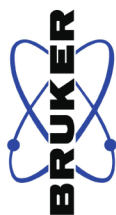

Current Data Parameters  
Name ni-4-17  
EXPNO 1  
PROCNO 1

F2 - Acquisition Parameters  
Date\_ 20100126  
Time\_ 5:23  
INSTRUM spect  
PROBHD 5 mm BBO BB-1H  
PULPROG zg  
TD 38460  
SOLVENT C6D6  
NS 8  
DS 0  
SWH 6410.256 Hz  
FIDRES 0.166673 Hz  
AQ 2.9999299 sec  
RG 128  
DW 78.000 usec  
DE 111.43 usec  
TE 295.5 K  
D1 7.00000000 sec  
ID0 1

===== CHANNEL f1 =====  
NUC1 1H  
P1 8.00 usec  
PL1 -6.00 dB  
SF01 400.1326008 MHz

F2 - Processing Parameters  
SI 32768  
SF 400.1300502 MHz  
WDW EM  
SSB 0 Hz  
LB 0 Hz  
GB 0  
PC 1.00

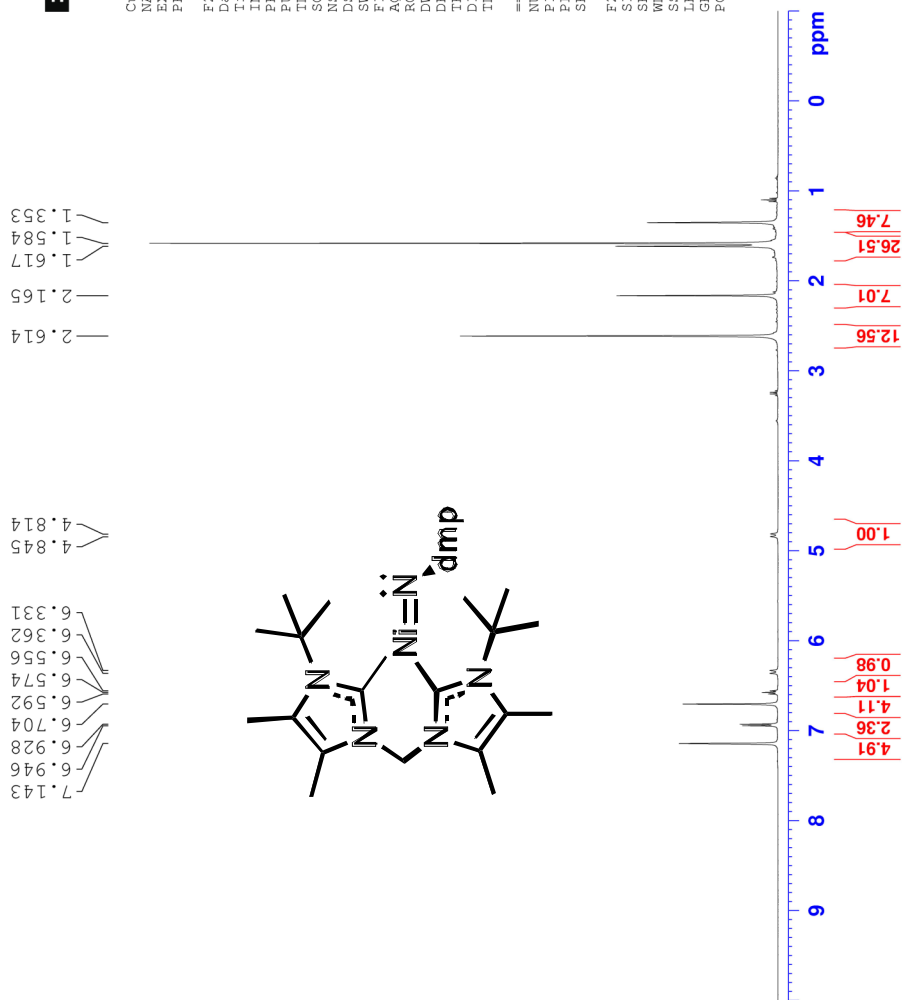

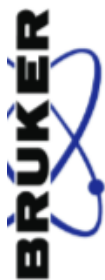

Current Data Parameters  
NAME nh-3-266  
EXPNO 6  
PROCNO 1

F2 - Acquisition Parameters  
Date\_ 20100810  
Time 9.03  
INSTRUM spect  
PROBHD 5 mm BBO BB-1H  
PULPROG zg  
TD 38460  
SOLVENT C6D6  
NS 8  
DS 0  
SWH 6410.256 Hz  
FIDRES 0.166673 Hz  
AQ 2.9999299 sec  
RG 80.6  
DW 78.000 usec  
DE 111.43 usec  
TE 295.6 K  
D1 7.00000000 sec  
TD0 1

===== CHANNEL f1 =====  
NUC1 1H  
P1 8.00 usec  
PL1 -6.00 dB  
SFO1 400.1326008 MHz

F2 - Processing parameters  
SI 32768  
SF 400.1300484 MHz  
EM  
WDW 0  
SSB 0 Hz  
LB 0  
GB 0  
PC 1.00

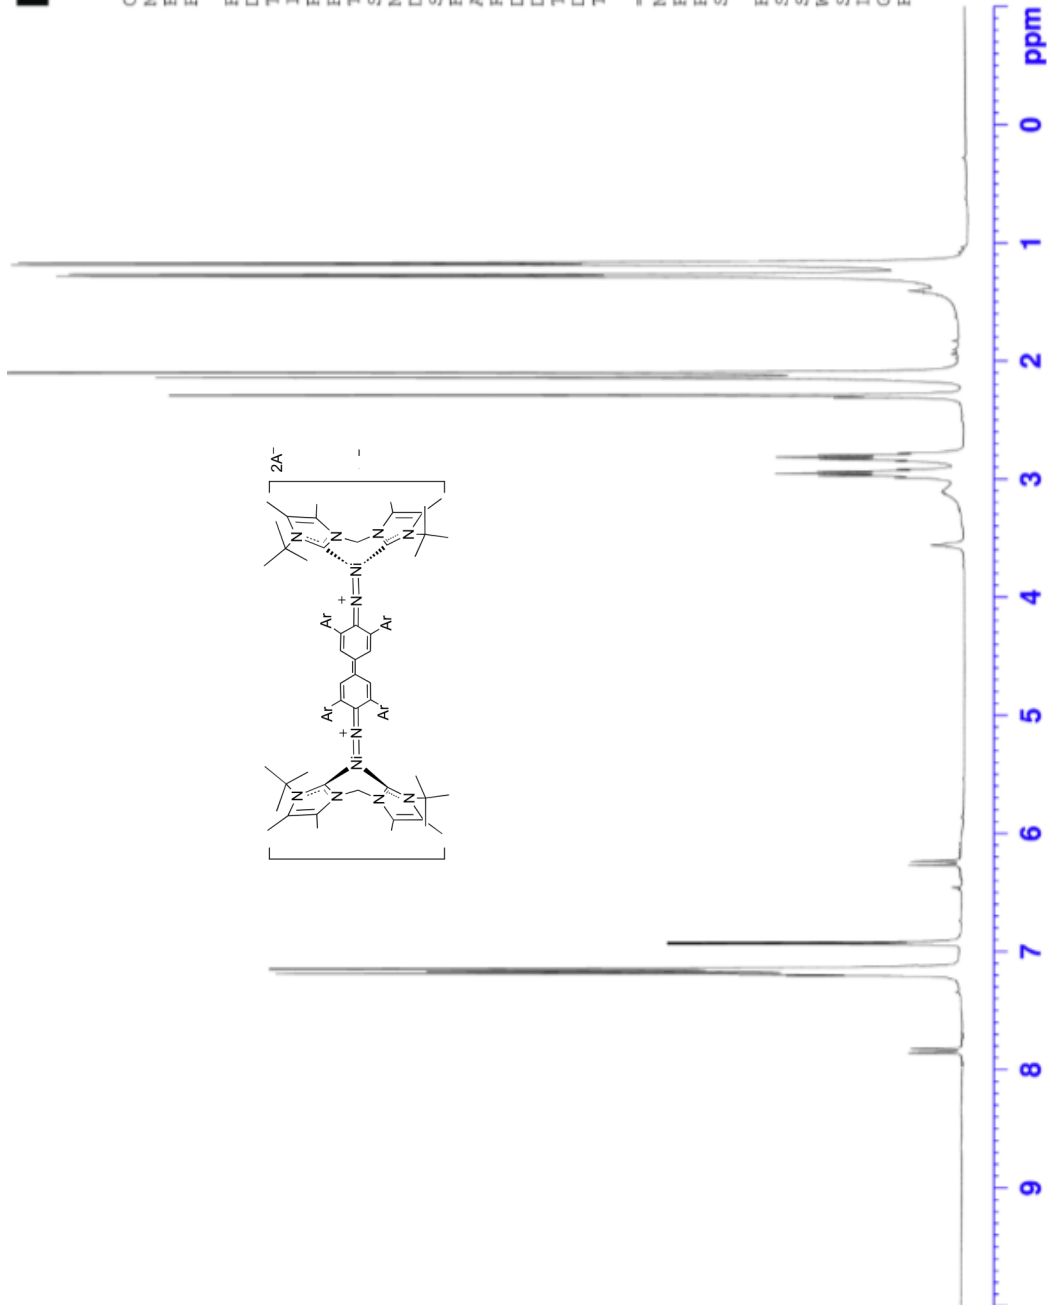

Supplement: c3sc51517f.pdf [file c3sc51517f.pdf]
